# Supplementary material
Source: PubMed Central journal article supplement (PMC3140445)
Supplement: supp_7.4.233_000261_Data_Supplement.pdf [file supp_7.4.233_000261_Data_Supplement.pdf]

## Sample user (clinician) satisfaction survey

Please circle your profession below:

**PHYSICIAN**

**NURSE**

**PHARMACIST**

Please indicate how many years you have worked at institution: \_\_\_\_\_

1. How often was/is the patient's chart available when you needed it?  
Never                  Rarely                  Sometimes                  Often                  Always  
1                          2                          3                          4                          5
2. How easy was/is it to identify the patient's diagnosis in the chart?  
Very Difficult      Difficult                  Average                  Easy                  Very Easy  
1                          2                          3                          4                          5
3. How easy was/is it to identify the current treatment plan for the patient in the chart?  
Very Difficult      Difficult                  Average                  Easy                  Very Easy  
1                          2                          3                          4                          5
4. How easy was/is it to identify a patient's past medical history in the chart?  
Very Difficult      Difficult                  Average                  Easy                  Very Easy  
1                          2                          3                          4                          5
5. How often are chemotherapy orders/documentation complete with all of the following: dose, frequency, route, rate and/or duration of administration, and treatment parameters?  
Never                  Rarely                  Sometimes                  Often                  Always  
1                          2                          3                          4                          5
6. How often are previous lab results available to you in the patient's chart?  
Never                  Rarely                  Sometimes                  Often                  Always  
1                          2                          3                          4                          5
7. How easy was/is it to identify a patient on a clinical trial in the patient's chart?  
Very Difficult      Difficult                  Average                  Easy                  Very Easy  
1                          2                          3                          4                          5
8. How often are clinical trial notes available in the patient's chart if that patient was/is on a clinical trial?  
Never                  Rarely                  Sometimes                  Often                  Always  
1                          2                          3                          4                          5
9. How often was/is the treatment calendar available in the patient's chart if that patient was on a clinical trial?  
Never                  Rarely                  Sometimes                  Often                  Always  
1                          2                          3                          4                          5
10. Overall, how would you rate your satisfaction with this chart system?  
Poor                  Fair                  Good                  Very Good                  Excellent  
1                          2                          3                          4                          5
11. How easy was/is it to identify the next treatment date?  
Very Difficult      Difficult                  Average                  Easy                  Very Easy  
1                          2                          3                          4                          5
12. How easy was/is it to identify the treatment MD?  
Very Difficult      Difficult                  Average                  Easy                  Very Easy  
1                          2                          3                          4                          5
13. How long on average did it take you to find all of the above information?  
0-3 min                  3-5 min                  5-8min                  8-10 min                  >10min
